# Supplementary material
Source: PubMed Central journal article supplement (PMC5884121)

## SUPPLEMENTAL FIGURE LEGENDS

**Figure S1. Glucose turnover after MCPG treatment.** (A) Endogenous glucose production and (B) glucose clearance were assessed two hours after infusion of vehicle (saline) or MCPG. In all panels, data are mean  $\pm$  S.E.M.. ( $n = 11$  per group).

**Figure S2. MCPG depletes hepatic acetyl CoA content through inhibiting  $\beta$ -oxidation of long chain fatty acids Effect of MCPG on hepatic  $\beta$ -oxidation.** Assessed two hours after infusion of vehicle or MCPG treatment. (A) Plasma  $\beta$ -OHB concentration ( $n = 10$  per group). (B) Hepatic MCP-formyl CoA (MCPG-CoA conjugate) concentration ( $n = 6$  per group). (C) Hepatic free CoA concentration ( $n = 6$  per group). (D) Hepatic acetyl-CoA concentration ( $n = 6$  per group). (E) Hepatic short and medium chain acyl CoA concentrations ( $n = 6$  per group). (F) Hepatic long chain acyl CoA concentrations ( $n = 10$  per group). In all panels, data are mean  $\pm$  S.E.M.. \* $p < 0.05$ , \*\* $p < 0.01$ , \*\*\* $p < 0.001$ , \*\*\*\* $p < 0.0001$ , versus control.

**Figure S3. Hepatic ATP:ADP ratios in MCPG treated mice.** Assessed two hours after treatment. Data are mean  $\pm$  S.E.M. ( $n = 9$  per group).

Figure S1

A

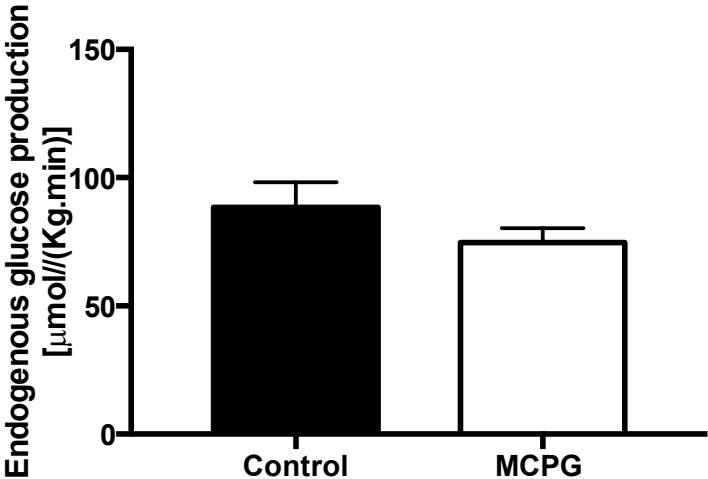

B

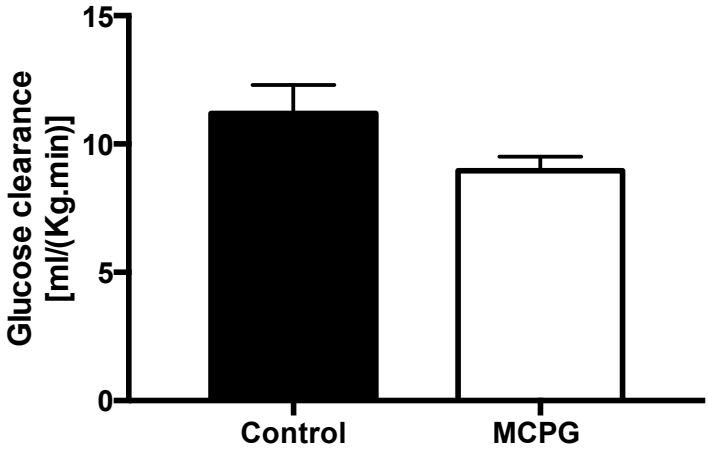

# Figure S2

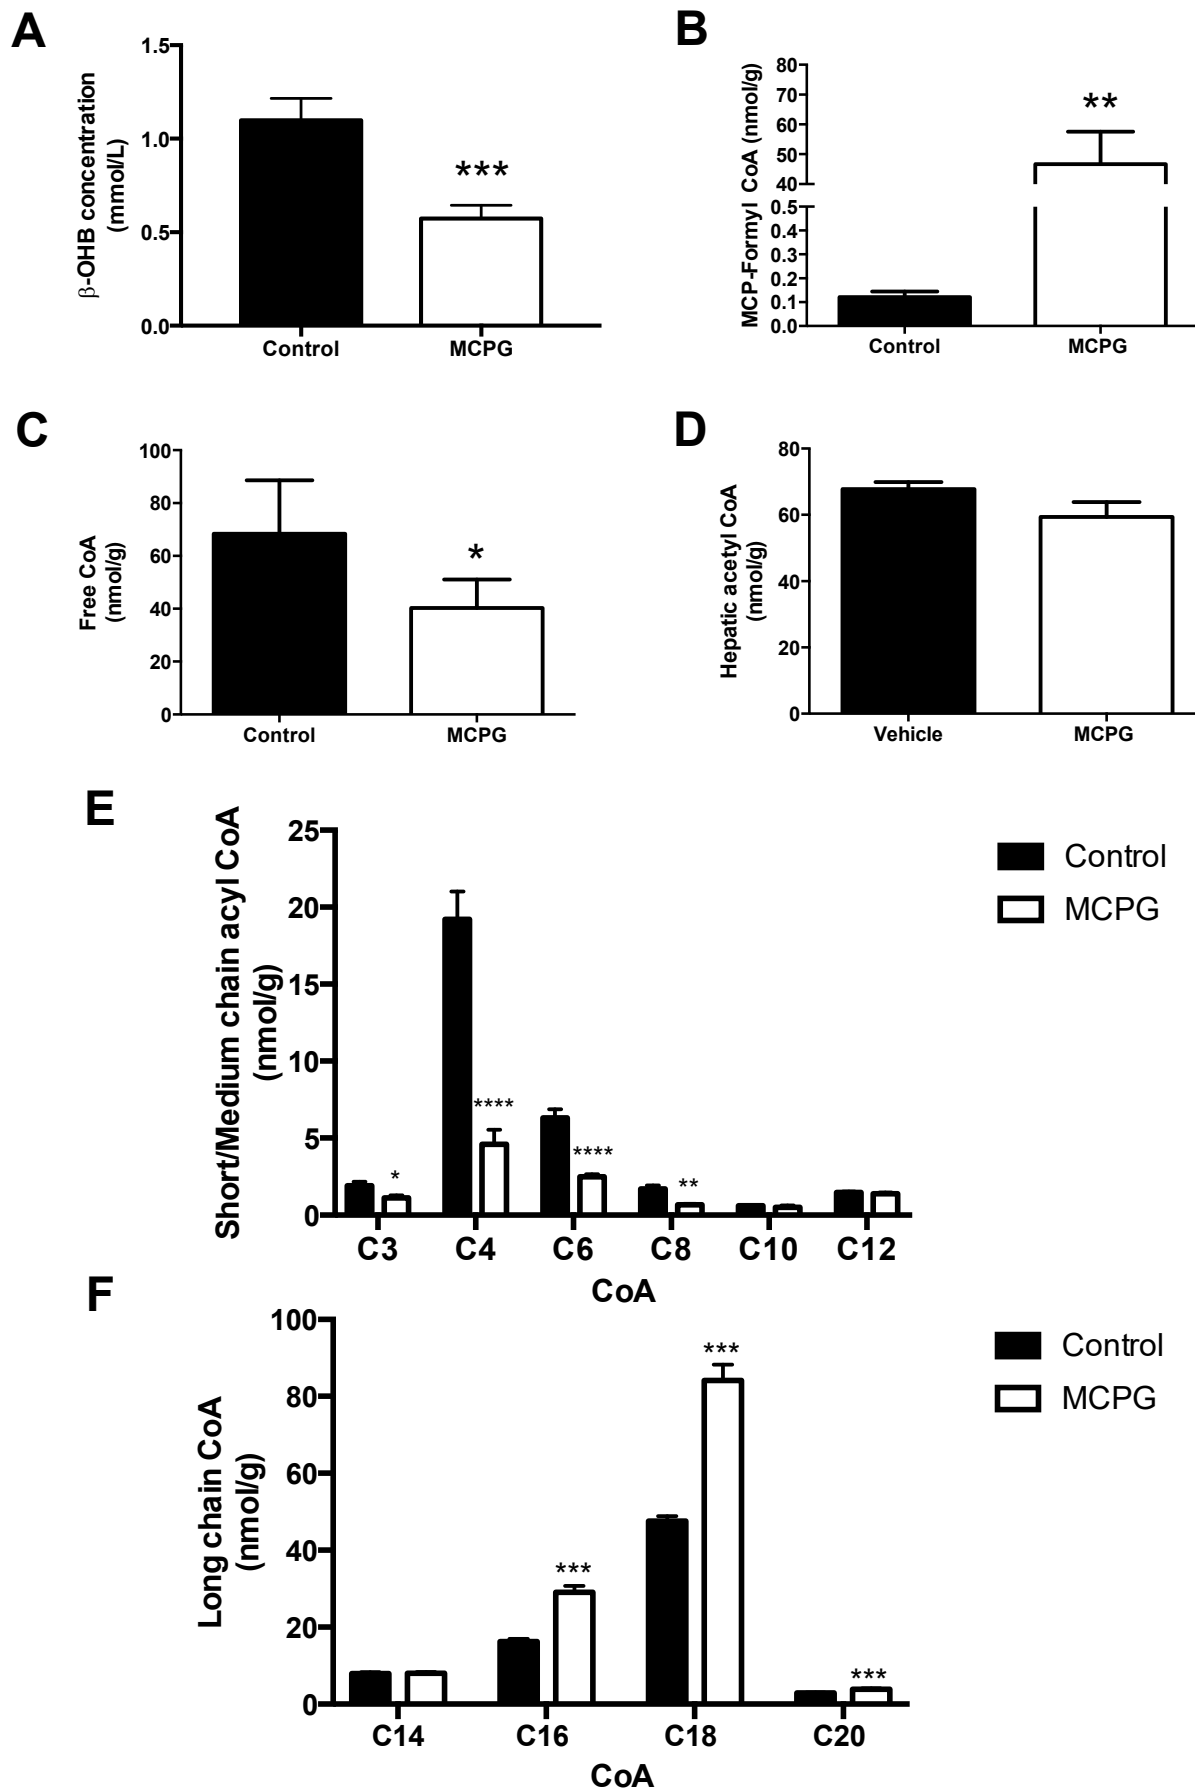

**Figure S3**

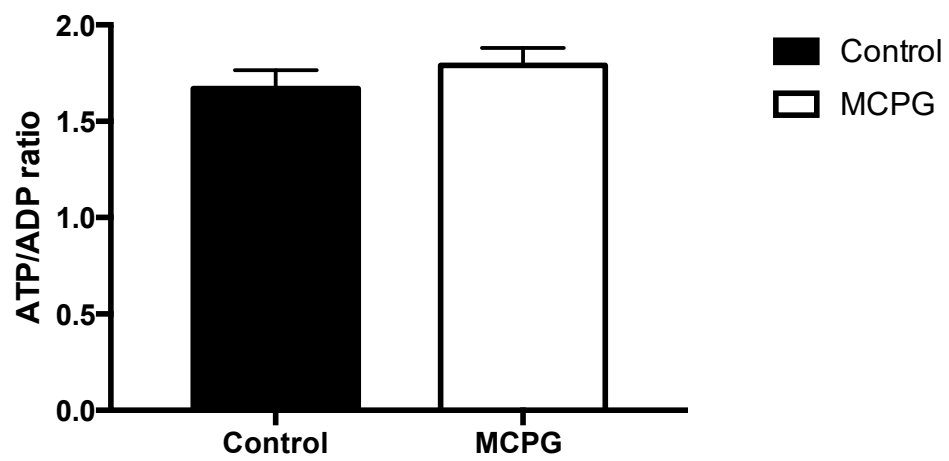

Supplement: NIHMS951664-supplement-Supplement_Figures.pdf [file NIHMS951664-supplement-Supplement_Figures.pdf]
