# Supplementary material
Source: PubMed Central journal article supplement (PMC5884121)
Supplement: NIHMS951664-supplement-Supplemental_Table_S1.pdf [file NIHMS951664-supplement-Supplemental_Table_S1.pdf]

**Table S1.** Hepatic substrate enrichments after [3-<sup>13</sup>C] lactate infusions.

|             | <i>Control (Vehicle) Treated</i> | <i>MCPA Treated</i> |
|-------------|----------------------------------|---------------------|
| M+1 Glucose | 15.2 ± 0.8                       | 5.6 ± 0.3           |
| M+2 Glucose | 1.4 ± 0.2                        | 0.49 ± 0.05         |
| C4C5C6 M+2  | 0.15 ± 0.02                      | 0.18 ± 0.00         |
| M+1 Lactate | 9.7 ± 1.2                        | 11.4 ± 0.4          |
